# Supplementary material
Source: PubMed Central journal article supplement (PMC6392182)

# Control staining

## Thymus

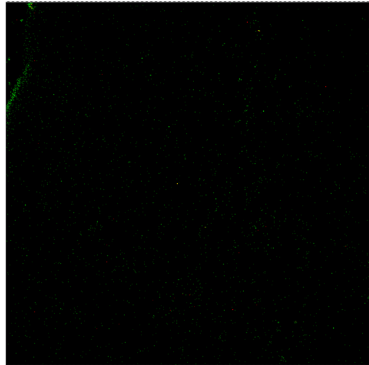

**NRIG**

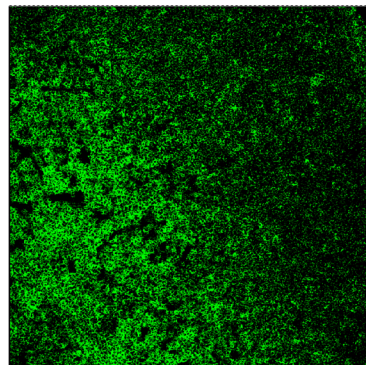

**CD3**

## Cuffed vascular wall

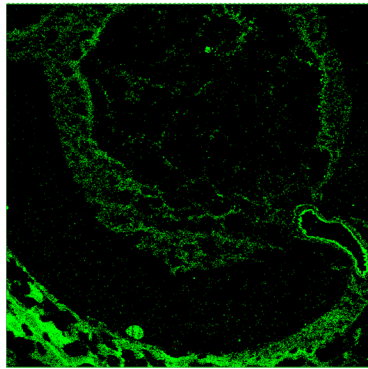

**NRIG**

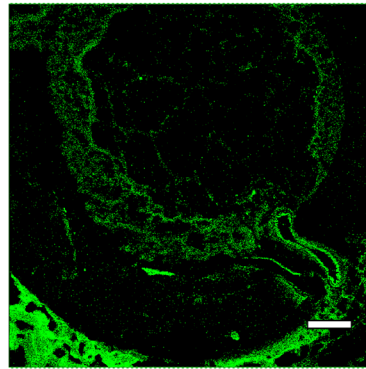

**CD3**

Supplement: NIHMS1000629-supplement-Supplemental_Figure_1.pdf [file NIHMS1000629-supplement-Supplemental_Figure_1.pdf]
